# Supplementary material
Source: publisher site journal article supplement (https://www.dovepress.com/article/570060)
Supplement: Supplementary file 1 [file 570060%20Supplementary%20Table%20S1.docx]

**Supplementary Table S1: Correlates of elevated serum PSA levels**

| **Variables** | **cOR (95%CI)** | ***p*-value** | **aOR** | ***p*-value** |
| --- | --- | --- | --- | --- |
| Age (years) | 1.04 (0.99–1.10) | 0.099 | – | – |
| Age categories |  |  |  |  |
| 40–49 | Referent | | | |
| 50–59 | 3.3 (0.8–13.8) | 0.098 | 82.1 (0.45–14876.1) | 0.097 |
| 60–69 | 4.3 (1.1–17.6) | 0.041* | 1071 (1.87–611056.3) | 0.031* |
| ≥ 70 | 1.95 (0.18–21.2) | 0.581 | 33804 (0.15–7.56) | 0.097 |
| BMI | 0.71 (059–0.86) | < 0.001* | – | – |
| BMI categories | | | | |
| Normal | Referent | | | |
| Underweight | 14.4 (3.7–55.5) | < 0.001* | 6512 (3.2–13300) | 0.024* |
| Overweight | 0.8 (0.08–8.0) | 0.845 | 704 (0.42–11655) | 0.083 |
| Obese | 2.3 (0.2–24.5) | 0.492 | 4 (0.005–2918) | 0.68 |
| Marital Status | | | | |
| Not in Union | Referent | | | |
| Married | 2.85 (0.36–22.9) | 0.324 | – | – |
| Cigarette Smoking Status | | |  |  |
| Never | Referent | | | |
| Former | 4.38 (1.15–16.6) | 0.031* | 0.67 (0.03–14.9) | 0.798 |
| Current | 11.4 (3.1–41.9) | < 0.001* | 1.27 (0.04–38.5) | 0.889 |
| Alcohol Consumption Status | | |  |  |
| Never | Referent | | | |
| Daily | 14 (2.9–68.4) | 0.001* | 50238 (6.08–41500) | 0.019* |
| Weekly | 1.34 (0.21–8.4) | 0.757 | 267 (0.5–14212) | 0.081 |
| Monthly | 1.86 (0.15–22.5) | 0.624 | 0.21 (0–1928) | 0.737 |
| Physical Exercise Frequency | | |  |  |
| Never | Referent | | | |
| Daily | 0.23 (0.03–1.9) | 0.175 | 1.46 (0.02–101.4) | 0.86 |
| Weekly | 0.37 (0.08–1.7) | 0.207 | 0.89 (0.009–83.9) | 0.959 |
| Monthly | 0.5 (0.1–2.4) | 0.383 | 0.12 (0.003–4.16) | 0.242 |
| Occupation | |  |  |  |
| Unemployed | Referent | | | |
| Formal | 0.11 (0.01–0.97 | 0.046* | 0.00004 (0.000001–0.35) | 0.029 |
| Self–Employed | 0.12 (0.01–1.03 | 0.053 | 0.033 (0.0001–5.9) | 0.198 |
| Farmer | 0.15 (0.05–0.49) | 0.002* | 0.001 (0.0003–0.39) | 0.023* |
| Labourer | 3.8 (0.31–47.2) | 0.299 | 1.33 (0.0005–3782) | 0.945 |
| Pesticide or Insecticide Exposure | | |  |  |
| No Exposure | Referent | | | |
| Low Exposure | – |  | – | – |
| High Exposure | 0.91 (0.33–2.48) | 0.85 | – |  |
| Vegetable or Fruits Consumption | | | |  |
| Rarely | Referent | | | |
| Occasionally | 0.66 (0.21–2.08) | 0.481 | – | – |
| Regularly | 0.66 (0.20–2.21) | 0.499 | – | – |
| Fat Rich or Fried Food Consumption | | | |  |
| Rarely | Referent | | | |
| Occasionally | 2.03 (0.57–7.28) | 0.275 | 27.4 (0.35–2170) | 0.138 |
| Regularly | 2.62 (0.84–8.23) | 0.098 | 299 (0.85–10559) | 0.057 |
| Protein Rich Food Consumption | | | |  |
| Rarely | Referent | | | |
| Occasionally | 0.61 (0.13–2.9) | 0.535 | – | – |
| Regularly | 0.5 (0.06–4.2) | 0.521 | – | – |
| Energy Rich Food Consumption | | | |  |
| Rarely | Referent | | | |
| Occasionally | 0.77 (0.04–13.9) | 0.859 | – | – |
| Regularly | 1.81 (0.22–15.1) | 0.584 | – | – |

**Key:** BMI: Body Mass Index, aOR: Adjusted odds ratio, cOR: Crude Odds Ratio. *Level of significance set at 0.05.
